# Supplementary material for: Seasonal Cycle and Relationship of Seasonal Rhino- and Influenza Virus Epidemics With Episodes of Asthma Exacerbation in Different Age Groups
Source: PubMed Central journal article supplement — Allergy Asthma Immunol Res. 2017 Aug 16;9(6):517–25. doi: 10.4168/aair.2017.9.6.517 (PMC5603480; doi:10.4168/aair.2017.9.6.517), 2017-08-16
Supplement: aair-9-517-s001.pdf [file aair-9-517-s001.pdf]

**Supplement Table.** Cross correlation coefficients and lag times\* for different pairs of locations

|         | Seoul | Busan     | Incheon   | Daegu      | Gwangju    | Daejeun    | Ulsan     |
|---------|-------|-----------|-----------|------------|------------|------------|-----------|
| Seoul   | 1     | 0.724 (1) | 0.724 (0) | 0.711 (0)  | 0.667 (0)  | 0.655 (0)  | 0.620 (1) |
| Busan   |       | 1         | 0.573 (0) | 0.573 (-1) | 0.577 (-1) | 0.539 (-1) | 0.495 (0) |
| Incheon |       |           | 1         | 0.610 (-1) | 0.629 (0)  | 0.489 (-1) | 0.511 (1) |
| Daegu   |       |           |           | 1          | 0.646 (0)  | 0.463 (-1) | 0.566 (1) |
| Gwangju |       |           |           |            | 1          | 0.423 (-1) | 0.534 (1) |
| Daejeun |       |           |           |            |            | 1          | 0.506 (1) |
| Ulsan   |       |           |           |            |            |            | 1         |

\*Each cell shows the cross correlation (lag time [as described in Table 3]) of AE for pairs of locations.
